# Supplementary material for: TGF-β inducible epithelial-to-mesenchymal transition in renal cell carcinoma
Source: PubMed Central journal article supplement (PMC6407676; doi:10.18632/oncotarget.26682), 2019-02-19
Supplement: oncotarget-10-1507-s001.pdf [file oncotarget-10-1507-s001.pdf]

# TGF- $\beta$ inducible epithelial-to-mesenchymal transition in renal cell carcinoma

## SUPPLEMENTARY MATERIALS

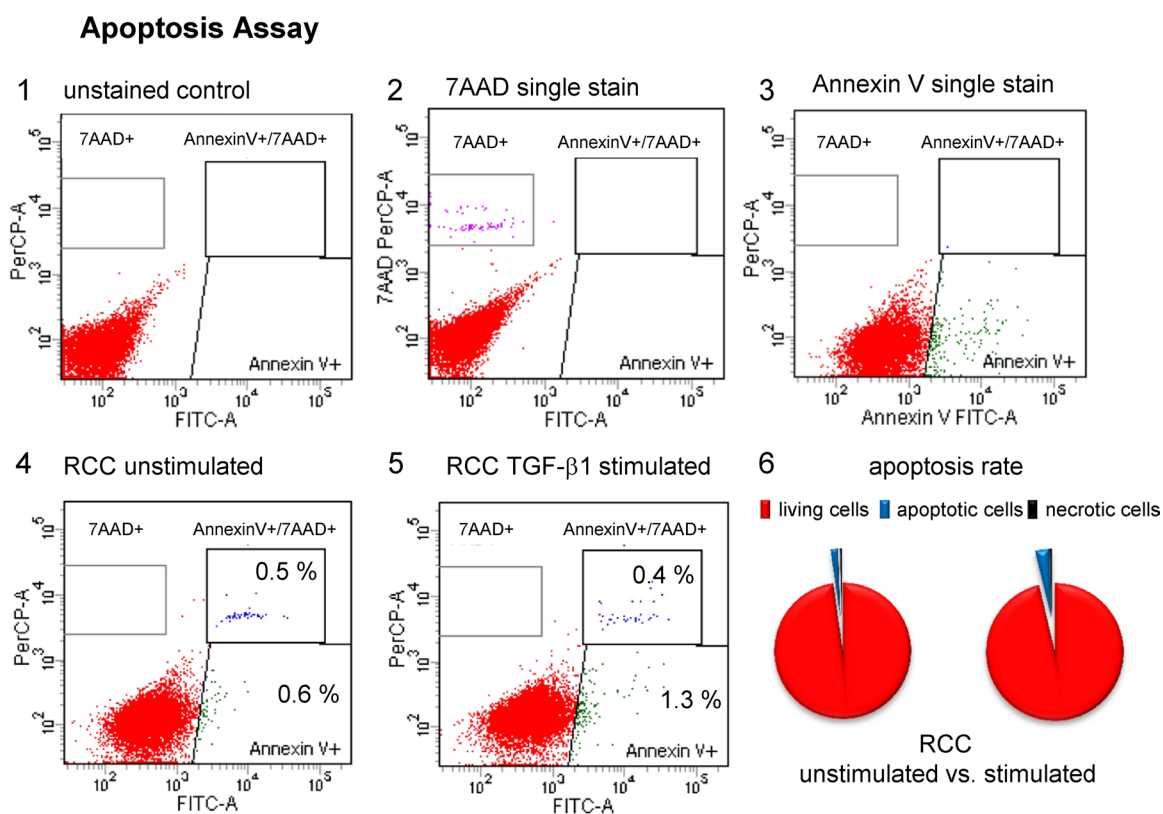

**Supplementary Figure 1: Influence of TGF- $\beta$ 1 treatment on apoptosis.** RCC cells were stained with 7AAD and annexin V and the frequency of stained cells as a measure of apoptosis or necrosis was determined over time. Diagrams 1–5 show the fluorescence intensity of annexin V-FITC on the x-axis and 7AAD-PerCP on the y-axis. Unstained control (1) and single stains (2, 3) were required for gating the cells and analyze TGF- $\beta$ 1-stimulated vs. unstimulated RCCs. Pie diagrams (6) show apoptosis rates of one representative experiment with 96 h TGF- $\beta$ 1-stimulated and unstimulated RCC cells.

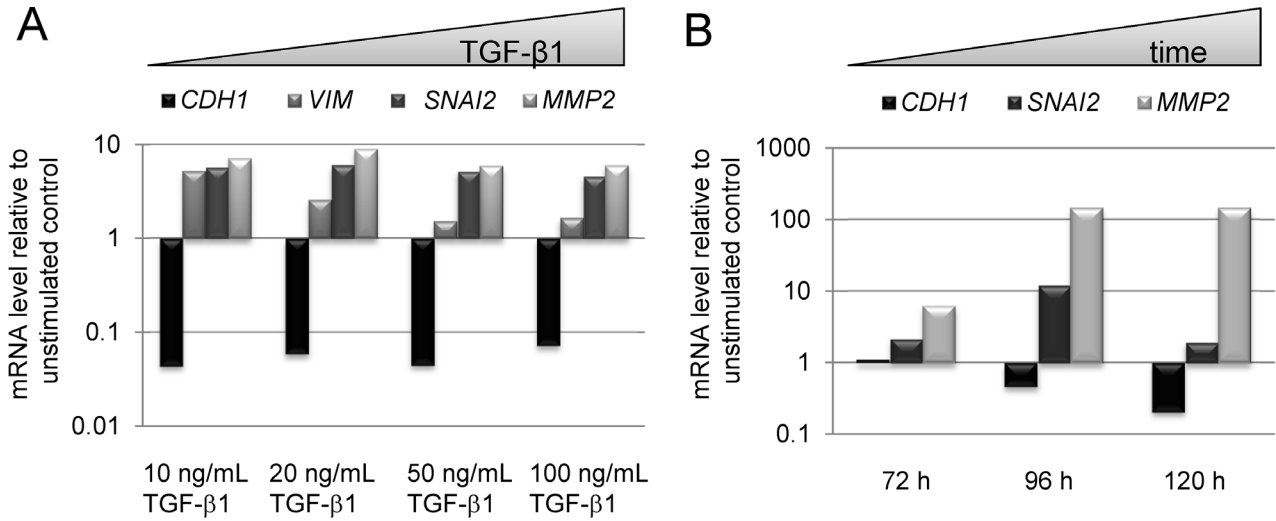

**Supplementary Figure 2: Effect of increasing amounts and interval of TGF- $\beta$ 1 treatment on renal cell lines.** *CDH1* repression and upregulation of mesenchymal markers were investigated via qPCR. Data from one representative experiment are shown, respectively. **(A)** EMT markers do not increase or decrease more with increasing amounts of TGF- $\beta$ 1 in MZ2733NN. 10 ng/mL appeared to be a suitable concentration of TGF- $\beta$ 1 to trigger EMT in renal cell lines. **(B)** MZ2858RC cells were treated for 72 h – 120 h with 10 ng/mL TGF- $\beta$ 1. Although the repression of *CDH1* and the expression of the mesenchymal markers seem to increase from 72 h to 96 h, no remarkable increase from 96 h to 120 h stimulation time was detected. Therefore, for RCC stimulation experiments, a treatment with 10 ng/mL TGF- $\beta$ 1 for 96 h was determined to be the method of choice.

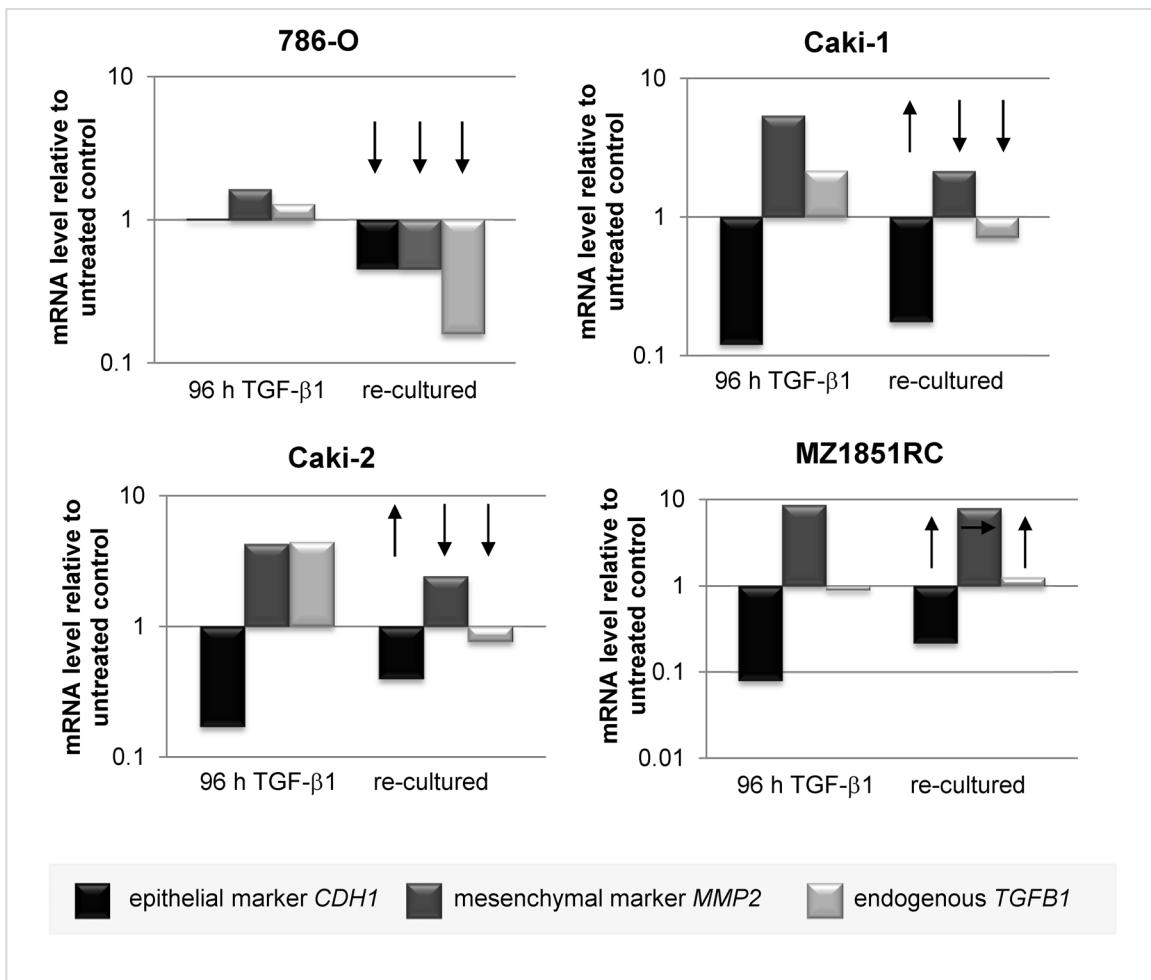

**Supplementary Figure 3: Reversibility of the mesenchymal transition of RCC cells analyzed by qPCR.** Bar graphs show data of one representative re-culturing experiment. RCC cell lines were tested for the reversibility of the mesenchymal transition after 96 h by re-culturing in medium without TGF-β1. Black bars display the mRNA levels of the epithelial marker *CDH1* relative to the untreated control after 96 h of TGF-β1 treatment and additional 96 h re-culturing, respectively. Dark grey bars indicate the mRNA levels of the mesenchymal marker *MMP2*; the light grey bars show *TGFBI* mRNA levels. Arrows label the increase (↑), decrease (↓) or no change (→) of mRNA levels of the respective genes after re-culturing.

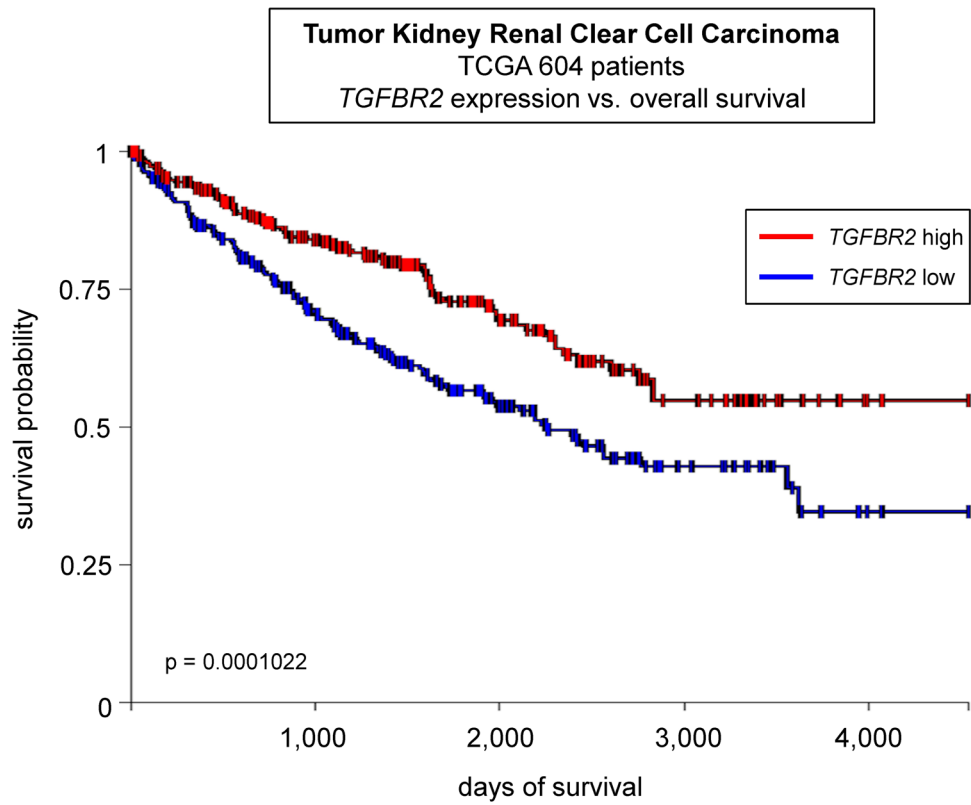

**Supplementary Figure 4: Kaplan-Meier curve for overall survival of ccRCC patients with different *TGFBR2* expression levels.** Patients with high *TGFBR2* expression ( $n = 301$ , red) have a significantly better overall survival ( $p$ -value = 0.0001022) than patients with low *TGFBR2* expression levels ( $n = 303$ , blue).

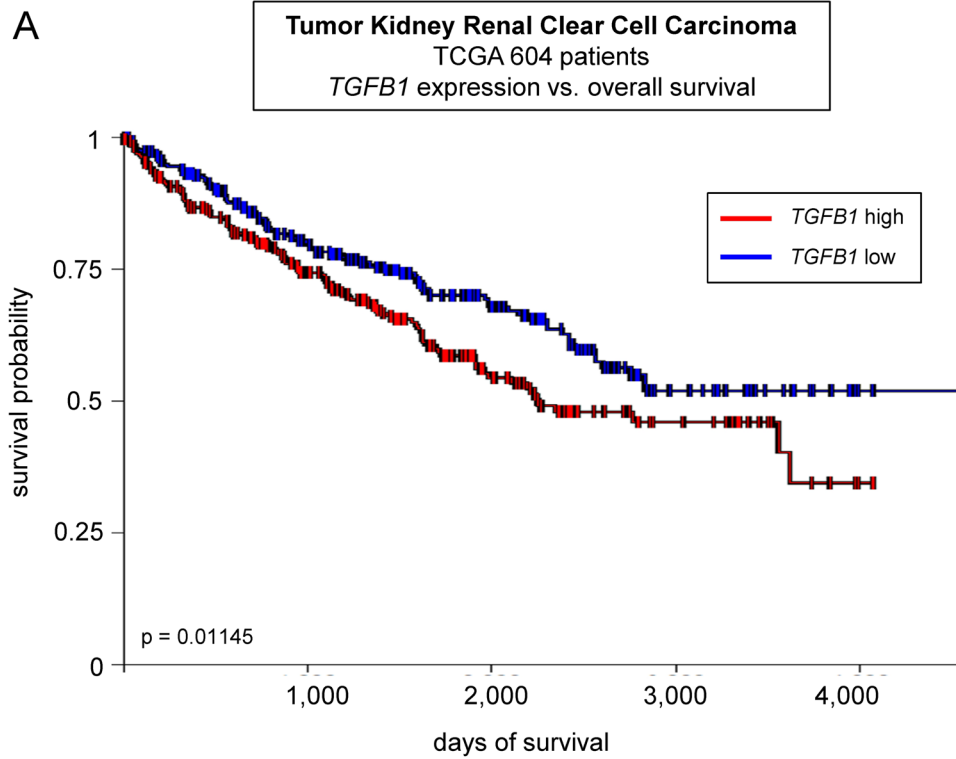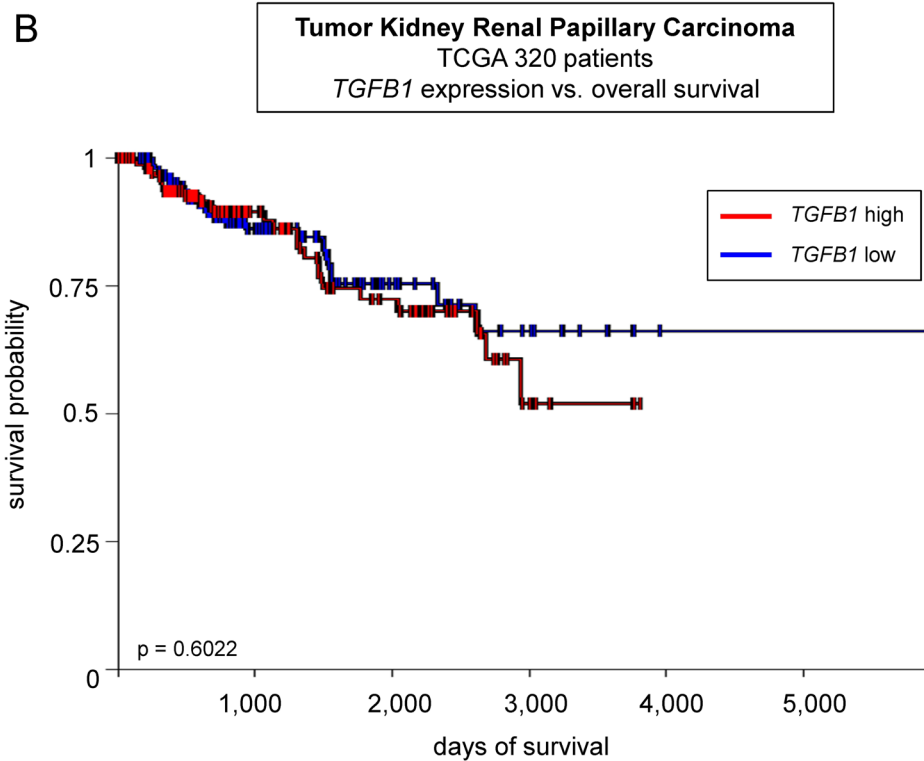

**Supplementary Figure 5: Kaplan-Meier curve for overall survival of ccRCC and pRCC patients with different *TGFB1* expression levels.** (A) Clear cell RCC patients with low *TGFB1* expression ( $n = 302$ , blue) have a significantly better overall survival ( $p$ -value = 0.01145) than patients with high *TGFB1* expression levels ( $n = 302$ , red). (B) No significant difference in overall survival was determined for pRCC patients with different *TGFB1* expression levels.

## APM components

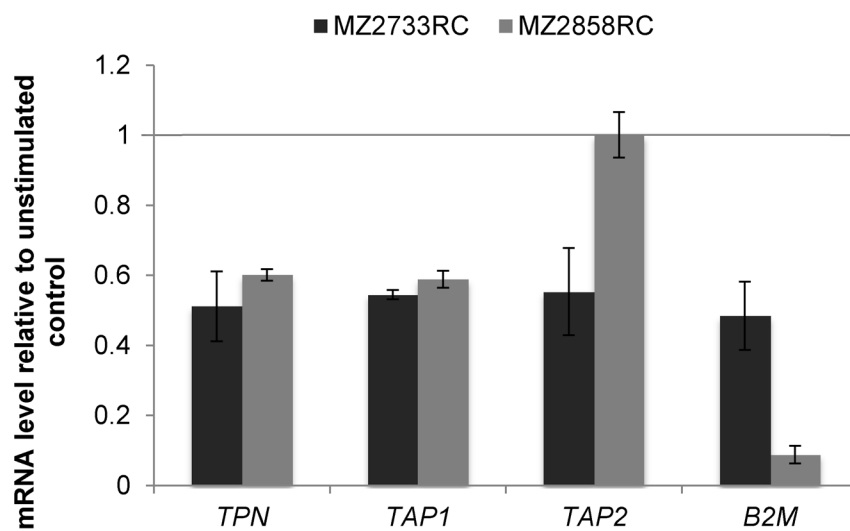

**Supplementary Figure 6: The effect of the TGF- $\beta$ 1 treatment on the mRNA levels of components of the antigen presenting and processing machinery.** Bar graphs show qPCR data of at least 3 independent stimulation experiments ( $n \geq 3$ ) normalized to the untreated control. *TPN*, TAP-binding protein tapasin; *TAP1/2*, transporter associated with antigen processing 1/2; *B2M*,  $\beta$ -2-microglobulin.

**Supplementary Table 1: Oligonucleotides used in qPCR experiments**

| Target Gene                                      | Abbreviation  | Primer name    | Primer sequence          |
|--------------------------------------------------|---------------|----------------|--------------------------|
| β-actin                                          | <i>ACTB</i>   | ACTB qPCR fw   | GAAGCATTTGCGGTGGACGAT    |
|                                                  |               | ACTB qPCR rv   | TCCTGTGGCATCCACGAAACT    |
| β <sub>2</sub> -microglobulin                    | <i>B2M</i>    | B2M qPCR fw    | CTCGCGCTACTCTCTCTT       |
|                                                  |               | B2M qPCR rv    | AAGACCAGTCCTTGCTGA       |
| E-cadherin                                       | <i>CDH1</i>   | CDH1 qPCR fw   | TCCCTTCACAGCAGAACTAACA   |
|                                                  |               | CDH1 qPCR rv   | AGTCACACACGCTGACCTCTAA   |
| N-cadherin                                       | <i>CDH2</i>   | CDH2 qPCR fw   | TGGGAATCCGACGAATGG       |
|                                                  |               | CDH2 qPCR rv   | TGCAGATCGGACCGGATACT     |
| claudin 1                                        | <i>CLDN1</i>  | CLDN qPCR fw   | CCTATGACCCAGTCAATGC      |
|                                                  |               | CLDN qPCR rv   | TCCCAGAAGGCAGAGAGAAG     |
| glyceraldehyde-3-phosphate dehydrogenase         | <i>GAPDH</i>  | GAPDH qPCR fw  | GGACTCATGACCACAGTCCAT    |
|                                                  |               | GAPDH qPCR rv  | AGGTCCACCACTGACACGTT     |
| metallo matrix protease 2                        | <i>MMP2</i>   | MMP2 qPCR fw   | ATGGCTACCGCTGGTGC GG     |
|                                                  |               | MMP2 qPCR rv   | GGTGCAGCTCTCATATTTGTTGCC |
| slug                                             | <i>SNAI2</i>  | SNAI2 qPCR fw  | GACCCTGGTTGCTTCAAGGA     |
|                                                  |               | SNAI2 qPCR rv  | TGTTGCAGTGAGGGCAAGAA     |
| snail                                            | <i>SNAI1</i>  | SNAI1 qPCR fw  | CATCCTTCTCACTGCCATG      |
|                                                  |               | SNAI1 qPCR rv  | GTCTTCATCAAAGTCCTGTGG    |
| tapasin                                          | <i>TPN</i>    | TPN qPCR fw    | TGGGTAAGGGACATCTGCTC     |
|                                                  |               | TPN qPCR rv    | ACCTGTCTTGACAGGTATGG     |
| transporter associated with antigen processing 1 | <i>TAP1</i>   | TAP1 qPCR fw   | GGAATCTCTGGCAAAGTCCA     |
|                                                  |               | TAP1 qPCR rv   | TGGGTGAACTGCATCTGGTA     |
| transporter associated with antigen processing 2 | <i>TAP2</i>   | TAP2 qPCR fw   | CCAAGACGTCTCCTTTGCAT     |
|                                                  |               | TAP2 qPCR rv   | TTCATCCAGCAGCACCTGTC     |
| transforming growth factor beta 1                | <i>TGFB1</i>  | TGFB1 qPCR fw  | GACTCGCCAGAGTGGTTATCTT   |
|                                                  |               | TGFB1 qPCR rv  | CTGAAGCAATAGTTGGTGTCCA   |
| transforming growth factor beta receptor 1       | <i>TGFBR1</i> | TGFBR1 qPCR fw | TGGCAGTAAGACATGATTCAGC   |
|                                                  |               | TGFBR1 qPCR rv | TAGATGTCAGCACGTTTGAAGG   |
| transforming growth factor beta receptor 2       | <i>TGFBR2</i> | TGFBR2 qPCR fw | AGATACATGGCTCCAGAAGTCC   |
|                                                  |               | TGFBR2 qPCR rv | ACTTCTCCCACTGCATTACAGC   |
| vimentin                                         | <i>VIM</i>    | VIM qPCR fw    | GGAGATGCTTCAGAGAGA       |
|                                                  |               | VIM qPCR rv    | TCTTCGTGGAGTTTCTTC       |
| zinc finger and homeobox transcription factor-1  | <i>ZEB1</i>   | ZEB1 qPCR fw   | GCCAATAAGCAAACGATTCTG    |
|                                                  |               | ZEB1 qPCR rv   | TTTGGCTGGATCACTTCAAG     |

Abbreviations: fw, forward; rv, reverse.

**Supplementary Table 2: Antibodies used for flow cytometry**

| <b>molecule</b> | <b>antibody</b>   | <b>company</b>  | <b>isotype</b> | <b>fluorophore</b> | <b>order no.</b> |
|-----------------|-------------------|-----------------|----------------|--------------------|------------------|
| HLA-ABC         | Anti-HLA-ABC      | Beckman Coulter | IgG2a          | FITC               | IM1838U          |
| HLA-BC          | Anti-human HLA BC | eBioscience     | IgG1           | APC                | 17-5935-42       |
| B7-H1           | Anti-human CD274  | eBioscience     | IgG1           | PE                 | 12-5983-42       |
| B7-H2           | Anti-human B7RP-1 | eBioscience     | IgG1           | PE                 | 12-5889-73       |
| B7-H3           | Anti-hB7-H3       | R&D systems     | IgG1           | APC                | FAB1027A         |
| B7-H4           | Anti hB7-H4       | AbD serotec     | IgG1           | FITC               | MCA2632F         |
| ICAM-1          | CD54-FITC         | Beckman Coulter | IgG1           | FITC               | IM0726U          |
| TIM-3           | Anti-TIM-3 FITC   | Miltenyi Biotec | IgG1           | FITC               | 130-104-646      |
| isotype control | IgG2a(mouse)-FITC | Beckman Coulter | IgG2a          | FITC               | A12689           |
| isotype control | IgG1(mouse)-FITC  | Beckman Coulter | IgG1           | FITC               | A07795           |
| isotype control | IgG1(mouse)-PE    | Beckman Coulter | IgG1           | PE                 | A07796           |
| isotype control | IgG1(mouse)-APC   | eBioscience     | IgG1           | APC                | 400122           |
